# Supplementary material for: Amphibians and Reptiles of the Montagne des Français: An Update of the Distribution and Regional Endemicity
Source: MDPI journal article supplement (doi:10.3390/ani13213361), 2023-10-29
Supplement: s1 [file s1]

## REPTILE SPECIES

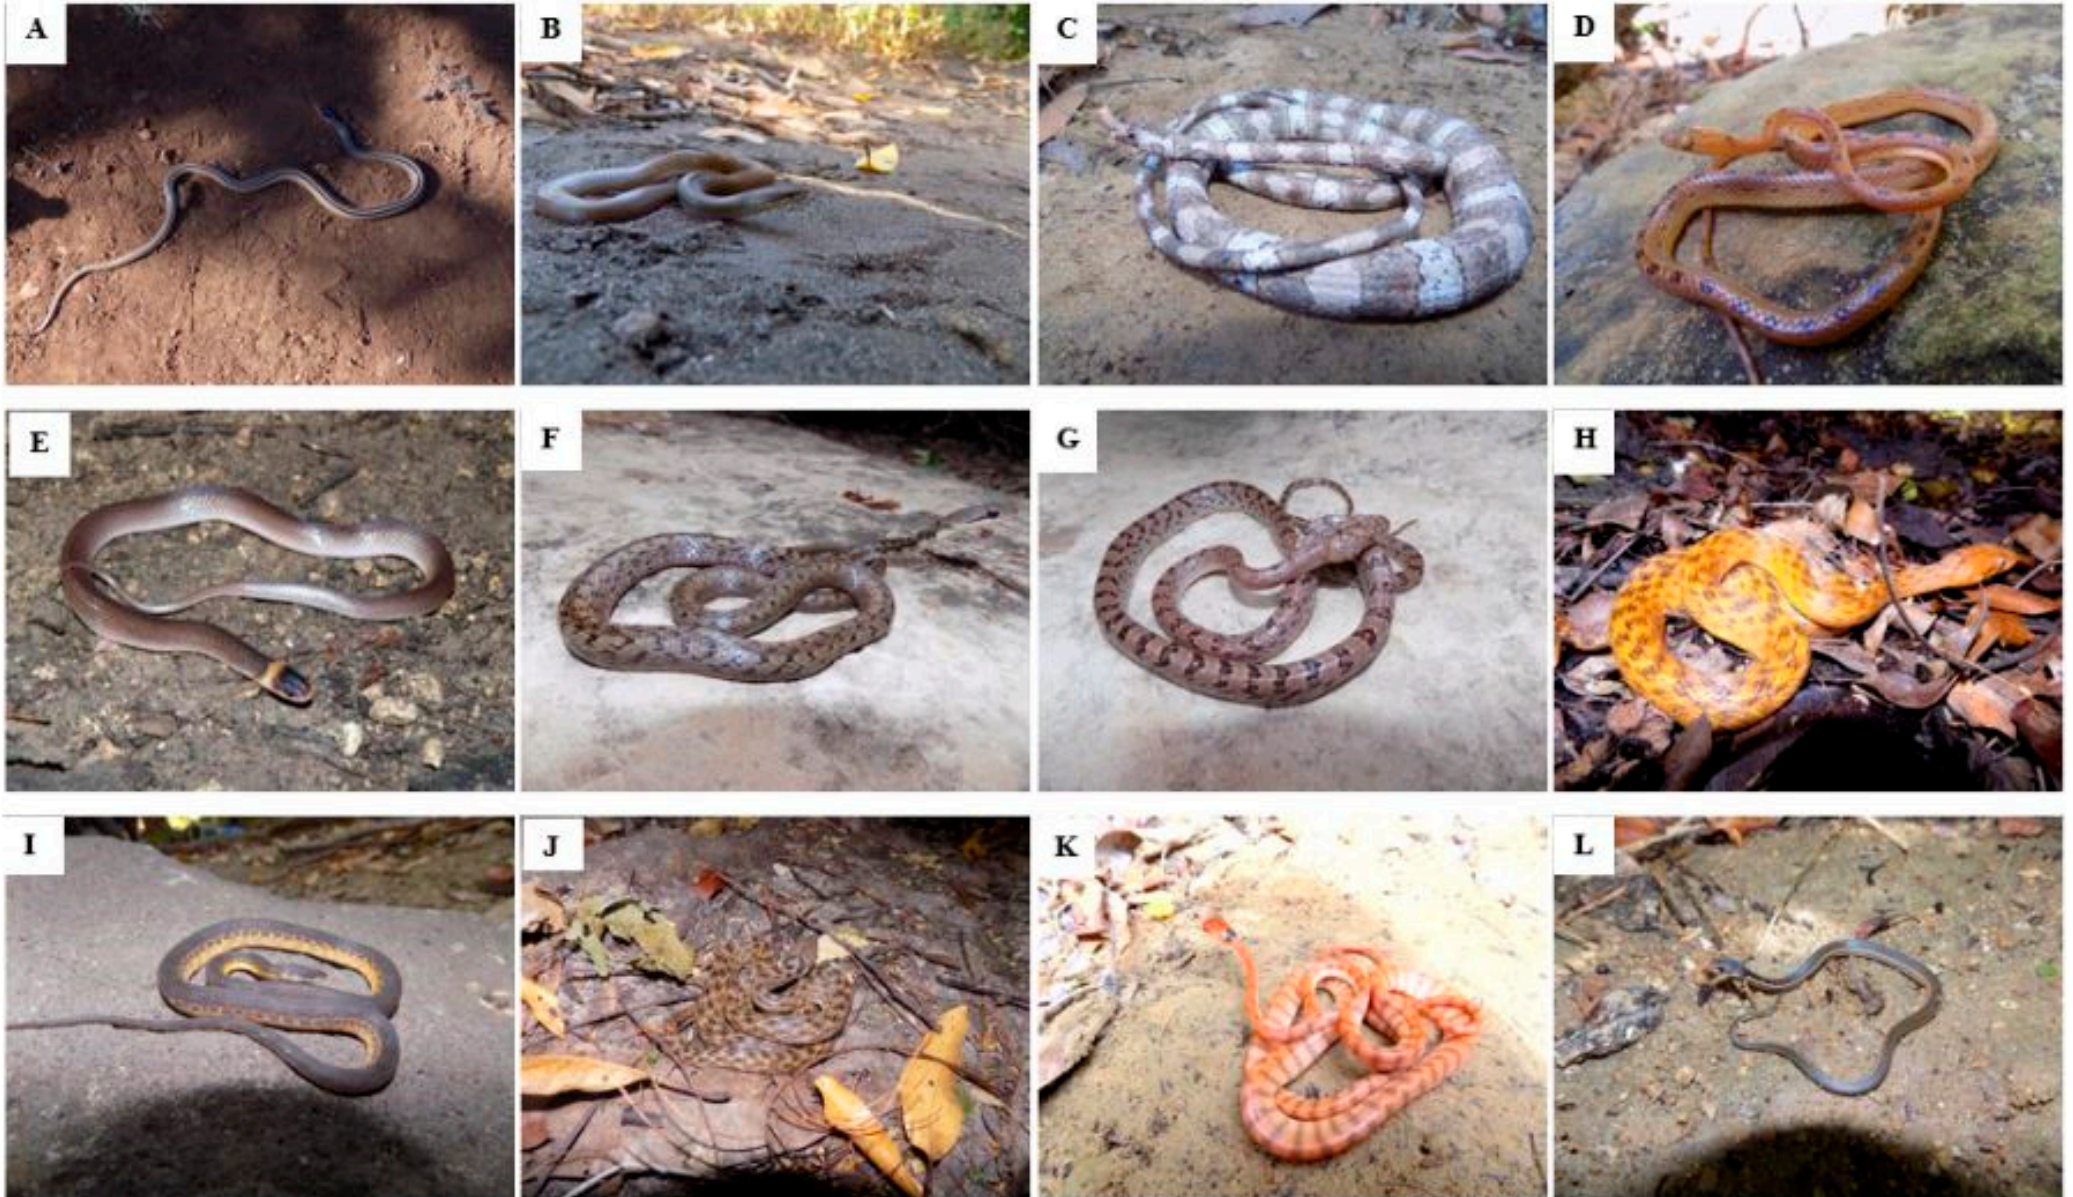

A) *Dromicodryas quadrilineatus*, B) *Liophidium torquatum*, C) *Langaha pseudoalluaudi*, D) *Lycadryas inopinae*, E) *Heteroliodon fohy*, F) *Thamnosophis martae*, G) *Lycodryas pseudogranuliceps*, H) *Madagascarophis fuchsi*, I) *Alluaudina belly*, J) *Madagascarophis colubrinus*, K) *Physalixella* sp., L) *Thamnosophis stumpffi*.



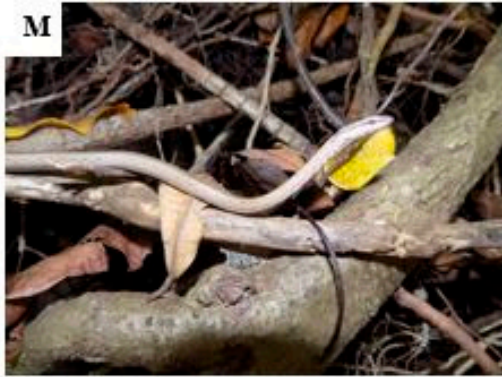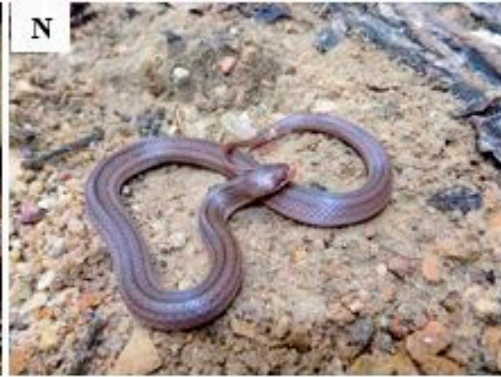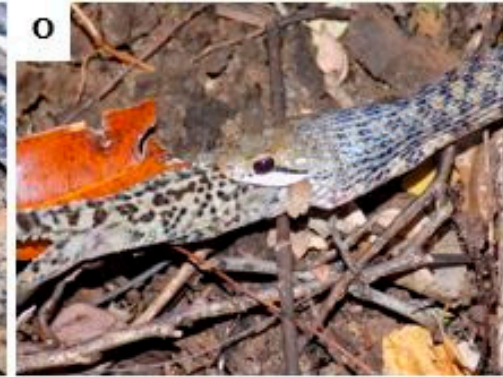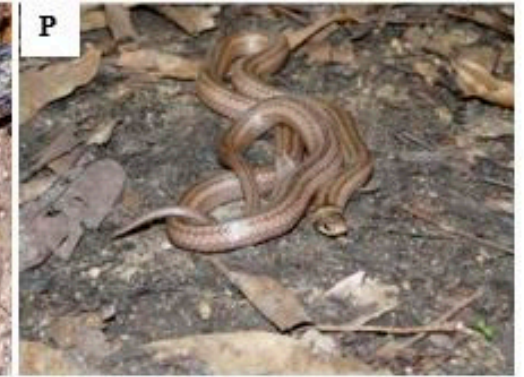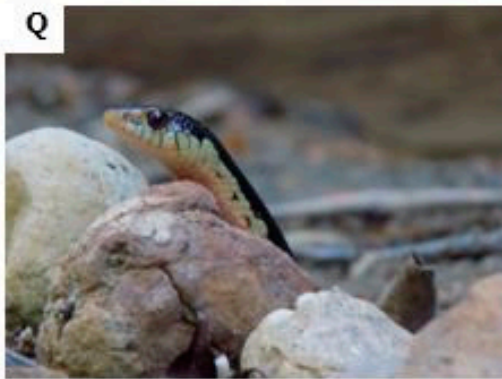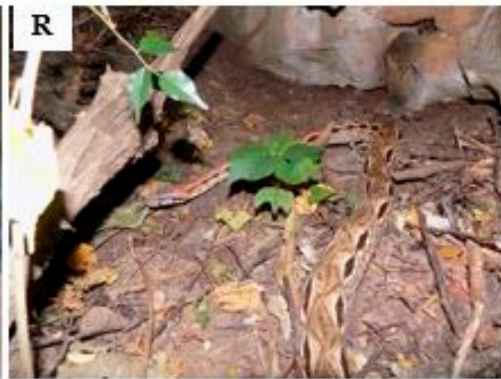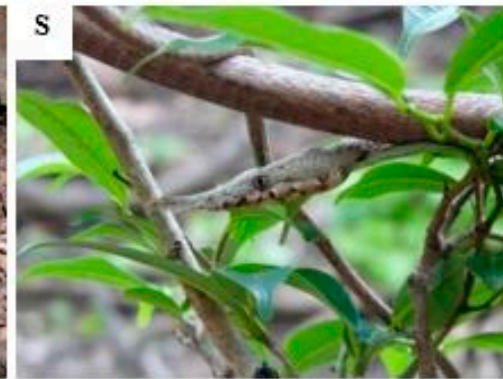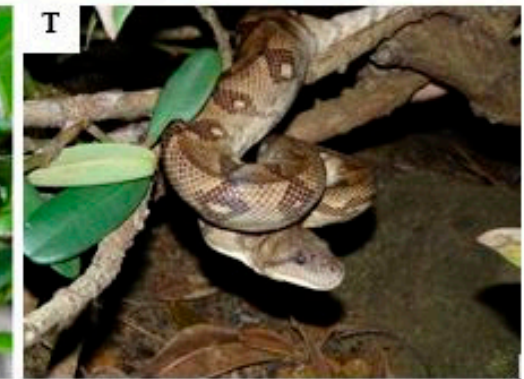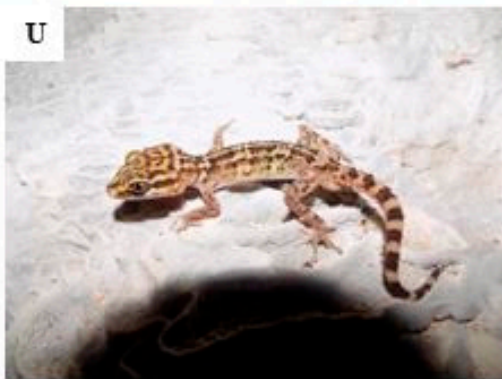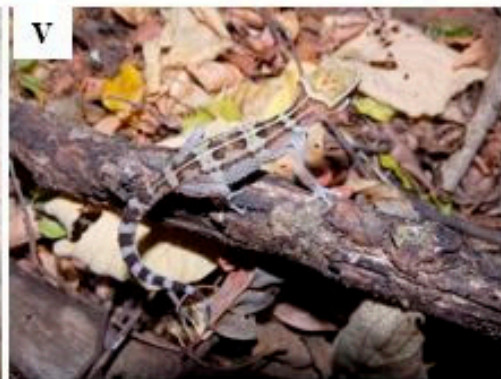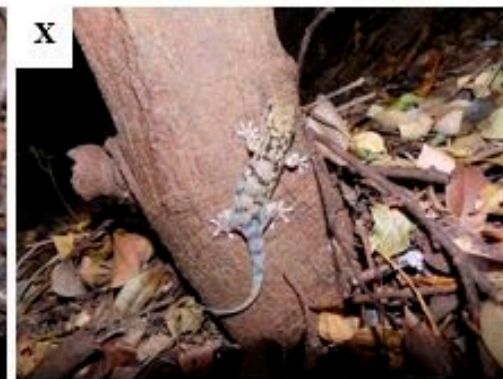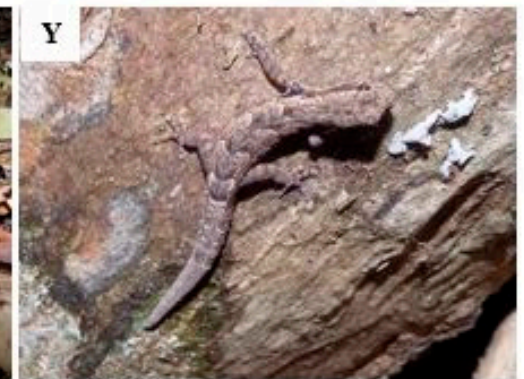

M) *Mimophis occutlus*, N) *Pseudoxyrhopus quinquelineatus*, O) *Thamnosophis martaе* end *Paroedura stumpffi* , P) *Luiphidium therezieni*, Q) *Leioheterodon madagascariensis* ,R) *Acrantophis madagascariensis*, S) *Langaha madagascariensis*, T) *Sanzinia volotany* U) *Paroedura lohatsara*, V) *Paroedura stumpffi*, X) *Geckolepis maculata*, Y) *Lygodactylus heterurus*



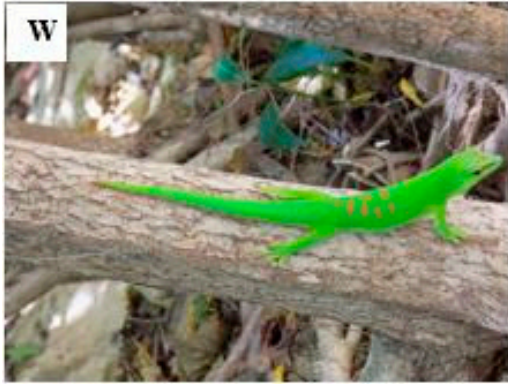

W

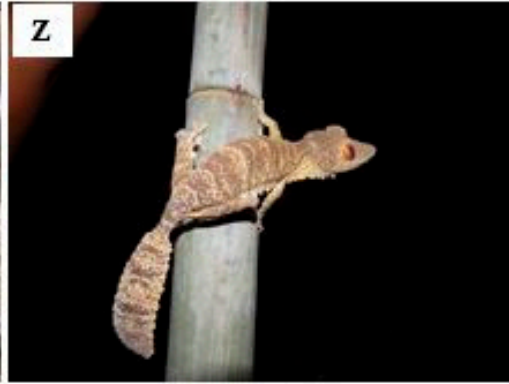

Z

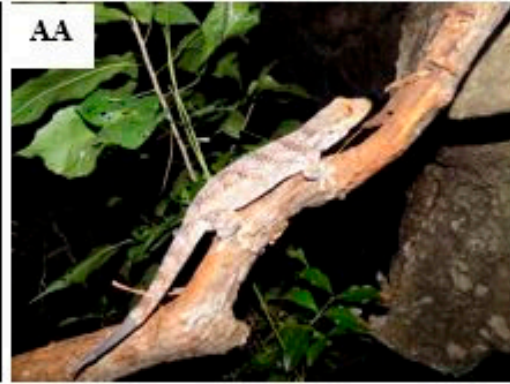

AA

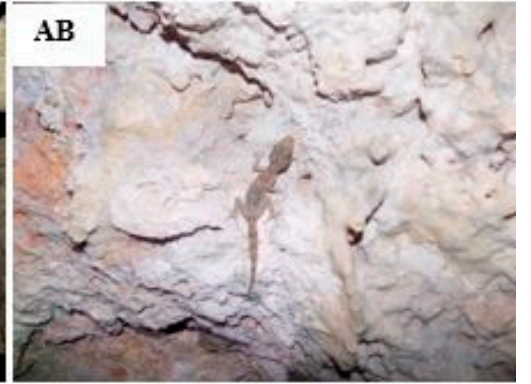

AB

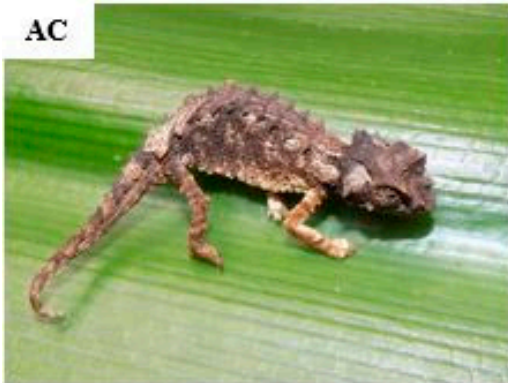

AC

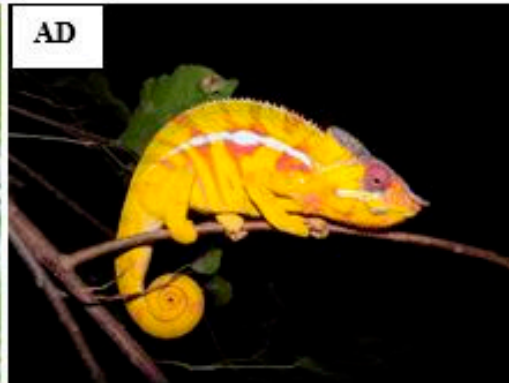

AD

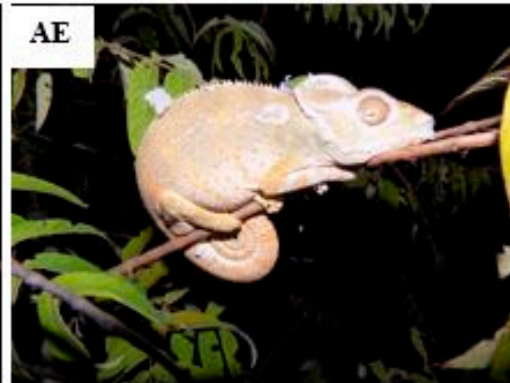

AE

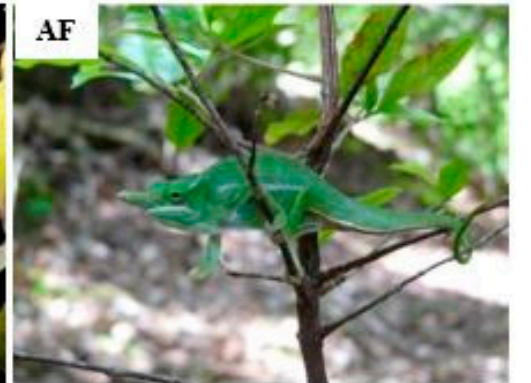

AF

W) *Phelsuma grandis*, Z) *Uroplatus henkeli*, AA) *Blaesodactylus boevini*, AB) *Paroedura hordiesi*, AC) *Brookesia ebenau*, AD *Furcifer pardalis*, AE) *Furcifer oustaleti*, AE) *Furcifer petteri*
