# Supplementary material for: Amphibians and Reptiles of the Montagne des Français: An Update of the Distribution and Regional Endemicity
Source: MDPI journal article supplement (doi:10.3390/ani13213361), 2023-10-29
Supplement: s1 [file s1]

# AMPHIBIAN SPECIES

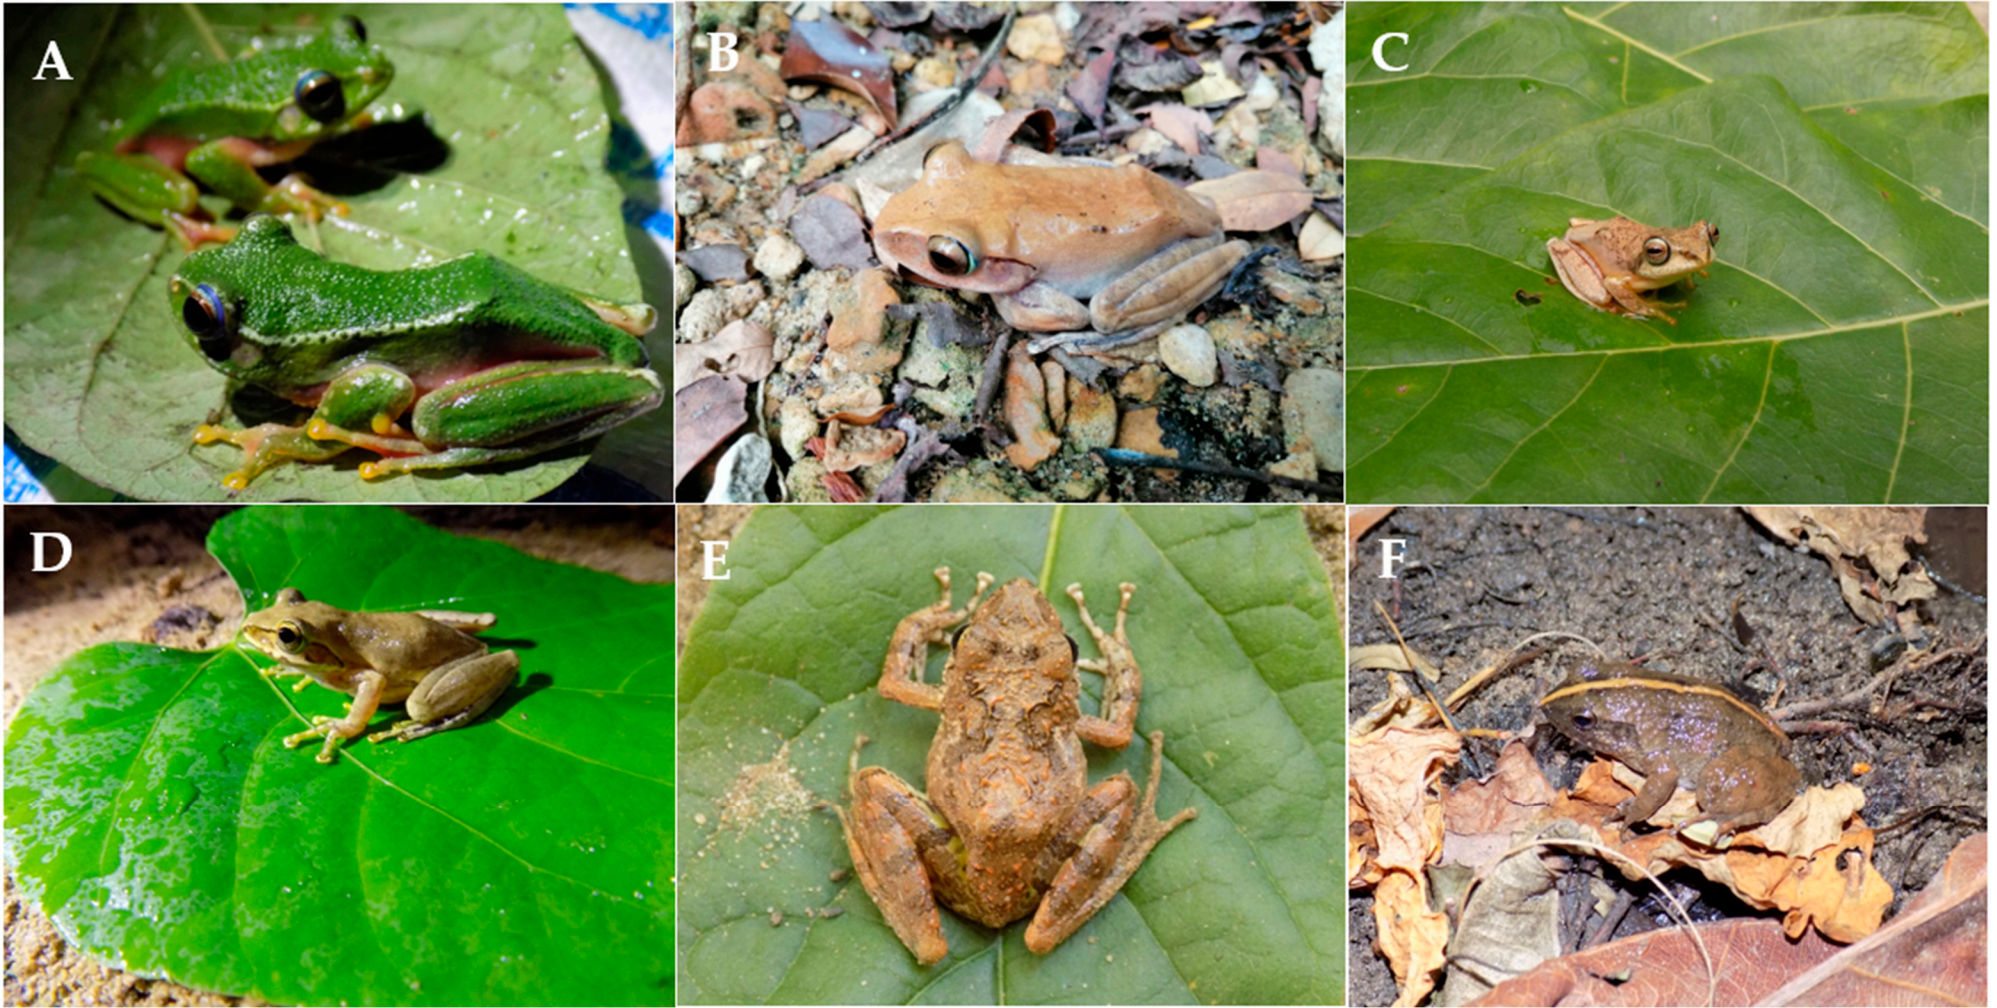

A : *Boophis* cf. *occidentalis* ; B : *Boophis* sp. ; C : *Boophis* cf. *marojezensis* ; D : *Boophis* *tephraeomystax* ; E : *Gephyromantis* *pseudoasper* ; F : *Mantidactylus* *ulcerosus*



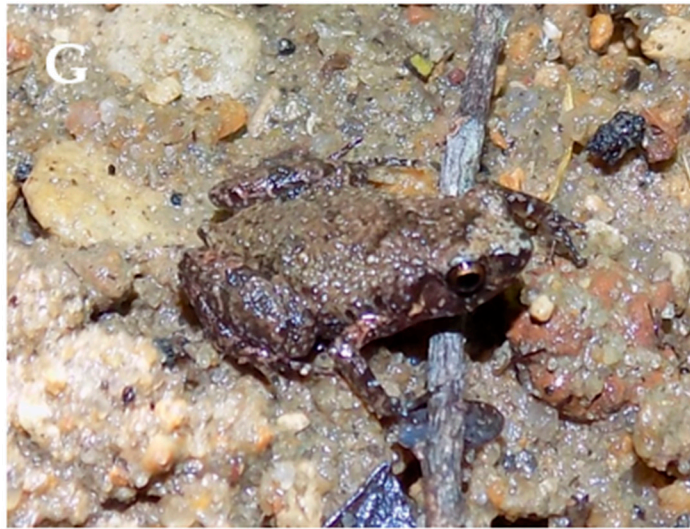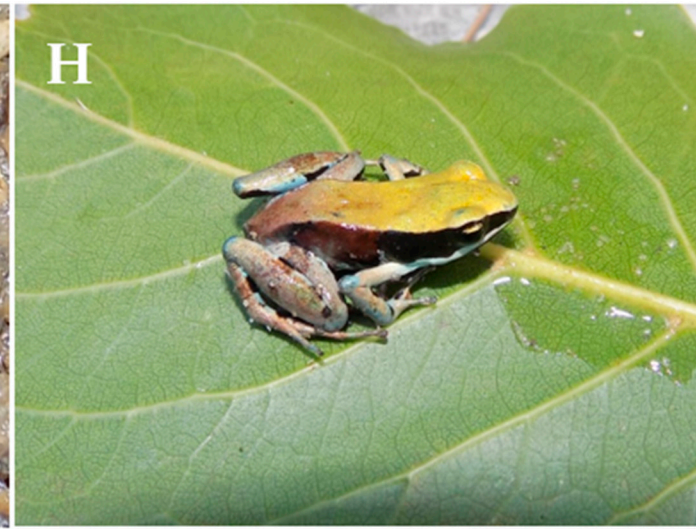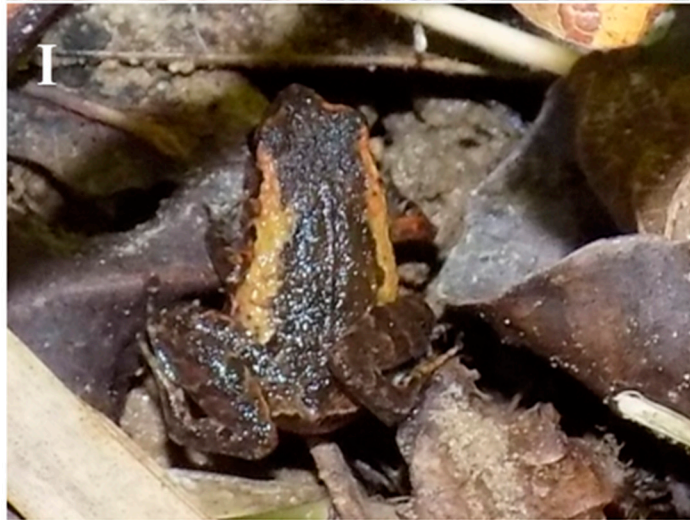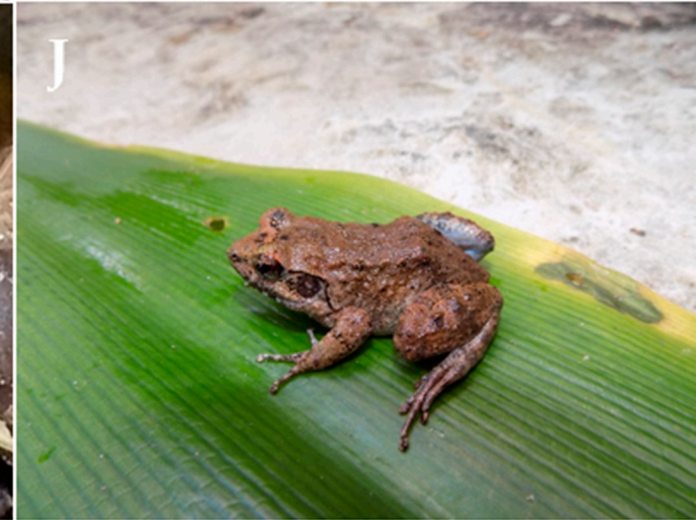

G : *Stumpffia roseifemoralis* ; H : *Mantella viridis* ; I : *Stumpffia* cf. *madagascariensis*; J : *Mantidactylus bellyi*
